# Supplementary material for: LGALS1 was related to the prognosis of clear cell renal cell carcinoma identified by weighted correlation gene network analysis combined with differential gene expression analysis
Source: Front Genet. 2023 Jan 12;13:1046164. doi: 10.3389/fgene.2022.1046164 (PMC9878452; doi:10.3389/fgene.2022.1046164)
Supplement: Supplementary file 6 [file Table9.XLSX]

## Sheet: cytoHubba_reslut
node_name	MCC	DMNC	MNC	Degree	EPC	BottleNeck	EcCentricity	Closeness	Radiality	Betweenness	Stress	ClusteringCoefficient
KNG1	45480	0.46953	17	17	38.465	55	0.08333	33.9667	2.77344	946	2348	0.42647
TIMP1	45360	0.61311	13	13	38.465	4	0.08333	31.7167	2.73438	352	1508	0.61538
ALB	45360	0.61311	13	13	38.465	4	0.08333	31.7167	2.73438	352	1508	0.61538
C3	40442	0.55613	12	14	38.405	3	0.06944	28.9333	2.5	314	916	0.42857
GPC3	40324	0.59858	10	10	38.371	2	0.06944	26.6833	2.46094	184	790	0.66667
VCAN	40322	0.69213	9	9	38.318	2	0.06944	26.1833	2.45443	61	394	0.80556
P4HB	40321	0.8164	8	9	38.19	3	0.06944	26.35	2.46094	248	796	0.77778
CHGB	40320	0.8164	8	8	38.329	1	0.06944	25.6833	2.44792	0	0	1
LGALS1	40320	0.8164	8	8	38.348	1	0.06944	25.6833	2.44792	0	0	1
EGF	5047	0.76834	7	13	38.43	64	0.10417	33.8333	2.85156	2298.29	5462	0.29487
HRG	5044	0.54893	9	9	38.355	1	0.08333	29.6333	2.70833	400.81	1352	0.63889
SERPINE1	5044	0.54893	9	9	38.41	9	0.08333	29.6333	2.70833	400.81	1352	0.63889
PROS1	5041	0.76834	7	8	38.198	2	0.08333	28.3	2.66276	126	208	0.75
SPARC	5040	0.76834	7	7	37.981	1	0.08333	27.8	2.65625	0	0	1
CXCR4	121	0.64826	5	6	36.678	3	0.06944	24.5167	2.42839	248	356	0.66667
SUCNR1	120	0.64826	5	5	36.779	1	0.06944	23.85	2.41536	0	0	1
PTGER3	120	0.64826	5	5	36.859	1	0.06944	23.85	2.41536	0	0	1
BDKRB2	120	0.64826	5	5	36.78	1	0.06944	23.85	2.41536	0	0	1
CLDN14	24	0.56839	4	4	4.332	1	0.03205	4	0.04808	0	0	1
CLDN8	24	0.56839	4	4	4.349	1	0.03205	4	0.04808	0	0	1
CLDN19	24	0.56839	4	4	4.351	1	0.03205	4	0.04808	0	0	1
CLDN16	24	0.56839	4	4	4.347	1	0.03205	4	0.04808	0	0	1
CLDN10	24	0.56839	4	4	4.353	1	0.03205	4	0.04808	0	0	1
ATP6V0D2	24	0.56839	4	4	4.473	1	0.03205	4	0.04808	0	0	1
ATP6V1G3	24	0.56839	4	4	4.458	1	0.03205	4	0.04808	0	0	1
ATP6V1C2	24	0.56839	4	4	4.483	1	0.03205	4	0.04808	0	0	1
ATP6V1B1	24	0.56839	4	4	4.459	1	0.03205	4	0.04808	0	0	1
ATP6V0A4	24	0.56839	4	4	4.449	1	0.03205	4	0.04808	0	0	1
SHC1	9	0.30898	3	8	33.178	12	0.08333	27.75	2.6237	1082.76	2736	0.07143
WNK4	8	0.46346	3	5	4.436	7	0.02244	5.5	0.15705	22	22	0.3
HADH	8	0.25931	5	5	8.238	3	0.02564	7.83333	0.29371	12.6667	24	0.4
PLAU	7	0.30898	3	6	31.845	7	0.06944	24.0333	2.4349	686.333	2156	0.2
ACADM	7	0.2842	4	5	8.195	2	0.03846	8	0.3007	23.6667	40	0.3
SCNN1B	6	0.46346	3	3	4.098	1	0.01496	4.33333	0.13462	0	0	1
SCNN1G	6	0.46346	3	3	4.118	1	0.01496	4.33333	0.13462	0	0	1
SCNN1A	6	0.46346	3	3	4.131	1	0.01496	4.33333	0.13462	0	0	1
KIT	6	0.30779	2	6	28.738	7	0.08333	26.3333	2.59115	714	1206	0.13333
HMGCS2	6	0.30898	3	5	8.049	4	0.03846	8	0.3007	27.6667	42	0.2
ACAA1	6	0.30898	3	5	8.042	2	0.02564	7.83333	0.29371	29.6667	52	0.2
CDH1	5	0	1	5	27.202	4	0.08333	24.2667	2.49349	394.762	876	0
ECHS1	5	0.30898	3	4	7.778	2	0.02564	7.16667	0.27972	8.66667	18	0.33333
GPC5	4	0.30898	3	3	32.132	1	0.05952	18.9548	2.0638	1	2	0.66667
SLC2A3	4	0.30898	3	3	24.166	1	0.05952	18.3452	2.05078	3	6	0.66667
DEGS1	4	0.30779	2	4	22.262	3	0.05952	18.8452	2.05729	248	732	0.33333
VAV3	4	0.30779	2	4	16.657	3	0.05952	17.1809	1.88151	249	882	0.16667
SH3GL2	4	0	1	4	28.257	7	0.08333	24.4833	2.53255	577.143	1488	0
L1CAM	4	0.30779	2	4	20.815	5	0.06944	20.5833	2.2526	402.381	1034	0.16667
SPTBN2	4	0.30898	3	3	14.665	2	0.05952	16.4643	1.86198	62	228	0.66667
ANK2	4	0.30898	3	3	14.944	1	0.05952	16.4643	1.86198	62	228	0.66667
ENPP3	4	0	1	4	3.311	6	0.01923	4.5	0.13846	18	18	0
TUBA1A	3	0.30779	2	3	2.707	2	0.02564	3	0.07692	4	4	0.33333
TFAP2A	3	0.30779	2	3	19.448	3	0.06944	19.7167	2.21354	248	412	0.33333
MET	3	0	1	3	27.762	1	0.06944	21.9167	2.35677	131	376	0
APBB1IP	3	0.30779	2	3	18.359	3	0.06944	20.1833	2.23958	248	456	0.33333
SHMT2	3	0.30779	2	3	3.309	6	0.01923	4	0.17692	12	12	0.33333
AGXT	3	0.30779	2	3	3.214	2	0.01282	3.83333	0.16923	8	8	0.33333
FABP1	3	0	1	3	6.989	2	0.02564	6.66667	0.27273	20.6667	32	0
MCCC1	3	0.30779	2	3	7.305	1	0.02564	6.5	0.26573	5	6	0.33333
TUBB6	2	0.30779	2	2	2.515	1	0.01282	2.5	0.06838	0	0	1
TUBB2B	2	0.30779	2	2	2.53	1	0.01282	2.5	0.06838	0	0	1
SIRPA	2	0.30779	2	2	22.031	1	0.05952	17.5119	2.03125	0	0	1
PNP	2	0	1	2	2.011	3	0.01923	2	0.06731	2	2	0
MYC	2	0	1	2	11.494	2	0.05952	15.5809	1.81641	126	208	0
TYMS	2	0	1	2	2.804	2	0.01282	3.33333	0.16154	8	8	0
LDHD	2	0	1	2	2.012	3	0.01923	2	0.06731	2	2	0
TFAP2B	2	0.30779	2	2	19.34	1	0.06944	19.05	2.20052	0	0	1
KCNJ1	2	0	1	2	3.31	2	0.02244	4	0.13462	10	10	0
ITGA5	2	0	1	2	21.121	1	0.05952	18.8286	2.11589	69.7143	136	0
PLAT	2	0.30779	2	2	29.276	1	0.06944	20.2667	2.30469	0	0	1
OXCT1	2	0.30779	2	2	6.523	1	0.02564	5.83333	0.25175	0	0	1
HS6ST2	2	0.30779	2	2	27.393	1	0.05952	18.4548	2.05729	0	0	1
LY6E	2	0.30779	2	2	2.298	1	0.01923	2	0.03846	0	0	1
XPNPEP2	2	0.30779	2	2	2.287	1	0.01923	2	0.03846	0	0	1
GP2	2	0.30779	2	2	2.291	1	0.01923	2	0.03846	0	0	1
FZD1	2	0	1	2	2.046	3	0.01923	2	0.06731	2	2	0
ERBB4	2	0.30779	2	2	27.831	1	0.08333	23.2833	2.51302	0	0	1
UGT8	2	0.30779	2	2	15.104	1	0.05208	14.6988	1.65365	0	0	1
SGPP1	2	0.30779	2	2	15.726	1	0.05208	14.6988	1.65365	0	0	1
ELMO1	2	0.30779	2	2	11.668	1	0.05208	13.6821	1.47786	0	0	1
CYFIP2	2	0.30779	2	2	11.513	1	0.05208	13.6821	1.47786	0	0	1
SLIT2	2	0	1	2	19.405	2	0.05952	17.8714	2.03125	126	180	0
COL4A5	2	0	1	2	20.232	2	0.05952	18.5381	2.0638	126	400	0
BLNK	2	0	1	2	19.268	4	0.06944	20.0167	2.2526	180	654	0
AXL	2	0	1	2	19.652	1	0.06944	20.0167	2.2526	180	654	0
AUH	2	0	1	2	6.442	1	0.02564	6	0.25874	2.66667	4	0
ESRP1	2	0.30779	2	2	12.634	1	0.05952	15.6643	1.83594	0	0	1
PEBP1	2	0.30779	2	2	12.202	1	0.05952	15.6643	1.83594	0	0	1
SCN2A	2	0.30779	2	2	11.804	1	0.05208	13.3869	1.45833	0	0	1
AK3	2	0	1	2	2.81	2	0.01923	3.5	0.12308	8	8	0
PIPOX	2	0.30779	2	2	2.997	1	0.01282	3.33333	0.16154	0	0	1
FABP5	2	0.30779	2	2	25.309	1	0.05952	19.2548	2.09635	0	0	1
ACLY	2	0.30779	2	2	25.051	1	0.05952	19.2548	2.09635	0	0	1
ACADSB	2	0	1	2	6.405	1	0.01923	5.75	0.24476	1.33333	4	0
SLC12A3	1	0	1	1	2.954	1	0.01496	3.33333	0.11966	0	0	0
PROCR	1	0	1	1	19.719	1	0.06944	19.1667	2.2526	0	0	0
UPP2	1	0	1	1	1.78	1	0.00962	1.5	0.05769	0	0	0
PFN2	1	0	1	1	10.962	1	0.05208	13.8762	1.62109	0	0	0
NPHS2	1	0	1	1	1.488	1	0.01282	1	0.03846	0	0	0
NPHS1	1	0	1	1	1.488	1	0.01282	1	0.03846	0	0	0
NNMT	1	0	1	1	1.747	1	0.00962	1.5	0.05769	0	0	0
NINL	1	0	1	1	2.118	1	0.01282	2	0.05983	0	0	0
UQCRFS1	1	0	1	1	1.466	1	0.01282	1	0.03846	0	0	0
NDUFA4	1	0	1	1	1.466	1	0.01282	1	0.03846	0	0	0
NR0B2	1	0	1	1	6.271	1	0.05208	12.4917	1.40625	0	0	0
MUC15	1	0	1	1	1.528	1	0.01282	1	0.03846	0	0	0
MUC1	1	0	1	1	1.528	1	0.01282	1	0.03846	0	0	0
MT1H	1	0	1	1	1.506	1	0.01282	1	0.03846	0	0	0
MT1G	1	0	1	1	1.506	1	0.01282	1	0.03846	0	0	0
MCM5	1	0	1	1	2.086	1	0.00962	2.41667	0.13077	0	0	0
PDHA1	1	0	1	1	1.771	1	0.00962	1.5	0.05769	0	0	0
LDHB	1	0	1	1	1.757	1	0.00962	1.5	0.05769	0	0	0
PTPRO	1	0	1	1	14.676	1	0.06944	18.3	2.18099	0	0	0
STAP1	1	0	1	1	14.252	1	0.06944	18.3	2.18099	0	0	0
KCNJ16	1	0	1	1	1.48	1	0.01282	1	0.03846	0	0	0
KCNJ10	1	0	1	1	1.48	1	0.01282	1	0.03846	0	0	0
SLC12A1	1	0	1	1	2.401	1	0.01496	2.83333	0.09722	0	0	0
IL4R	1	0	1	1	17.514	1	0.06944	18.85	2.21354	0	0	0
OGDHL	1	0	1	1	1.489	1	0.01282	1	0.03846	0	0	0
IDH2	1	0	1	1	1.489	1	0.01282	1	0.03846	0	0	0
NR3C2	1	0	1	1	1.485	1	0.01282	1	0.03846	0	0	0
HSPA2	1	0	1	1	1.485	1	0.01282	1	0.03846	0	0	0
SOST	1	0	1	1	1.794	1	0.00962	1.5	0.05769	0	0	0
SFRP1	1	0	1	1	1.786	1	0.00962	1.5	0.05769	0	0	0
FGF9	1	0	1	1	1.495	1	0.01282	1	0.03846	0	0	0
FGF1	1	0	1	1	1.495	1	0.01282	1	0.03846	0	0	0
PTPN13	1	0	1	1	1.477	1	0.01282	1	0.03846	0	0	0
FAS	1	0	1	1	1.477	1	0.01282	1	0.03846	0	0	0
G0S2	1	0	1	1	4.354	1	0.01923	4.5	0.2028	0	0	0
QPRT	1	0	1	1	2.394	1	0.01282	2.83333	0.10769	0	0	0
GMPR	1	0	1	1	2.411	1	0.01282	2.83333	0.10769	0	0	0
PYGL	1	0	1	1	2.426	1	0.01282	2.83333	0.10769	0	0	0
PAG1	1	0	1	1	20.131	1	0.08333	21.6	2.44141	0	0	0
VDR	1	0	1	1	1.511	1	0.01282	1	0.03846	0	0	0
CYP27B1	1	0	1	1	1.511	1	0.01282	1	0.03846	0	0	0
TNFAIP6	1	0	1	1	1.497	1	0.01282	1	0.03846	0	0	0
CTSH	1	0	1	1	1.497	1	0.01282	1	0.03846	0	0	0
SERPINH1	1	0	1	1	11.031	1	0.05208	14.2262	1.65365	0	0	0
EPCAM	1	0	1	1	13.549	1	0.06944	17.2833	2.08333	0	0	0
CDH6	1	0	1	1	14.177	1	0.06944	17.2833	2.08333	0	0	0
PVALB	1	0	1	1	1.49	1	0.01282	1	0.03846	0	0	0
CALB1	1	0	1	1	1.49	1	0.01282	1	0.03846	0	0	0
CA2	1	0	1	1	13.264	1	0.06944	17.2833	2.08333	0	0	0
ISG15	1	0	1	1	1.479	1	0.01282	1	0.03846	0	0	0
BST2	1	0	1	1	1.479	1	0.01282	1	0.03846	0	0	0
SOSTDC1	1	0	1	1	1.5	1	0.01282	1	0.03846	0	0	0
BMPR1B	1	0	1	1	1.5	1	0.01282	1	0.03846	0	0	0
FXYD4	1	0	1	1	1.489	1	0.01282	1	0.03846	0	0	0
ATP1A1	1	0	1	1	1.489	1	0.01282	1	0.03846	0	0	0
KLHL13	1	0	1	1	1.519	1	0.01282	1	0.03846	0	0	0
ASB9	1	0	1	1	1.519	1	0.01282	1	0.03846	0	0	0
AP1M2	1	0	1	1	14.486	1	0.06944	17.5167	2.1224	0	0	0
FECH	1	0	1	1	1.506	1	0.01282	1	0.03846	0	0	0
ALAD	1	0	1	1	1.506	1	0.01282	1	0.03846	0	0	0
PDE1A	1	0	1	1	2.236	1	0.01282	2.5	0.09231	0	0	0
GPT2	1	0	1	1	2.404	1	0.00962	2.58333	0.13846	0	0	0
PHYH	1	0	1	1	5.06	1	0.01923	4.91667	0.22378	0	0	0
